# Supplementary material
Source: publisher site journal article supplement (https://www.degruyterbrill.com/publication/journal_key/RMEEF/downloadAsset/RMEEF_SI_call_for_papers_v2.docx)
Supplement: Supplementary file 1 [file RMEEF_SI_call_for_papers_v2.docx]

November 4, 2023

**Review of Middle East Economics and Finance Special Issue:**

**On the Repercussions of War on Energy Markets in the Middle East**

This Special Issue focuses on the impact of war in the Middle East on global and regional energy markets.

**Guest editors:**

Leila Dagher, Lebanese American University, Lebanon

Stephane Goutte, University Paris-Saclay, France

Khaled Guesmi, Paris School of Business, France

**Special issue information:**

In 2021, the Russia-Ukraine war in Europe was a stark reminder of how sensitive energy markets are to geopolitical risk and tensions. More recently, the October 2023 war in the Middle East has raised concerns among policymakers on the short-term and long-term implications of conflicts on energy markets. Following these recent developments and after exactly 50 years since the first oil embargo, it is crucial to investigate the interplay between geopolitical risk, energy markets, and economic activity in the MENA region. Specifically, this special issue aims to uncover the repercussions of geopolitical tensions on energy security, the transition to clean energy, and the different transmission channels to economic activity in MENA countries.

Topics of interest include (but are not limited to) the following in the context of the war in the Middle East:

- Impact on energy prices and price volatility
- Transmission channels of geopolitical risk and uncertainty to energy markets
- The effect on the clean energy transition
- Comparing resilience of net importers and net exporters of energy products
- Implications on carbon markets
- Impact on GHG emissions
- Issues associated with environmental and climate policy design
- Adapting national energy policies
- Energy security dynamics
- Trends in energy poverty
- Challenges for SDG7 progress
- Energy trade concerns

**Proposed Timeline**

Open for submissions: January 1, 2024

Last date to submit: July 31, 2024

**Manuscript submission information:**

Authors should prepare their manuscript in line with the author guidelines available at this link:

<https://www.degruyter.com/journal/key/rmeef/html#submit>

Papers for the special issue should be submitted through the submission portal: 

<https://mc.manuscriptcentral.com/dgrmeef>

When submitting, please ensure that you select the special issue called “VSI: War & Energy”.
